# Supplementary material for: The effect of smoking on DNA methylation of peripheral blood mononuclear cells from African American women
Source: PubMed Central journal article supplement (PMC3936875; doi:10.1186/1471-2164-15-151), 2014-02-22
Supplement: 1471-2164-15-151-S4.pdf [file 1471-2164-15-151-S4.pdf]

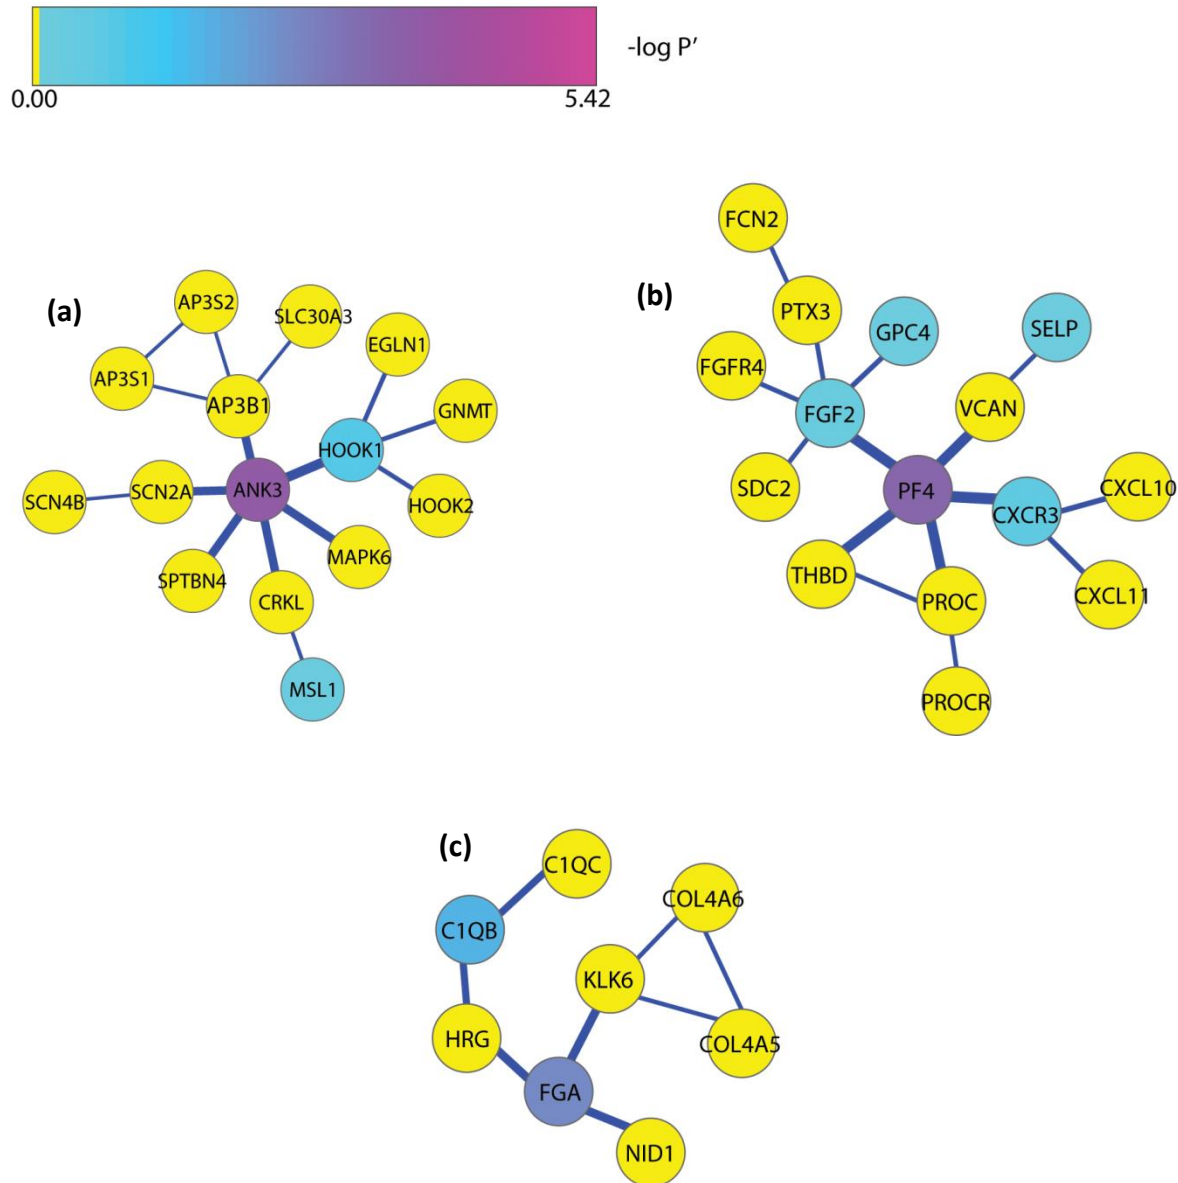

**Additional File 4. Figure S2. Protein sub-networks identified by the miPALM algorithm and visualized using Cytoscape.** Strength of the interaction between two proteins is depicted by line width. The color of each node represents the negative log p-value from the t-test (see color bar insert) between smokers and non-smokers after correction for multiple comparisons ( $-\log P'$ ). Sub-network (a) consists of 15 proteins ( $p < 0.02$ ) enriched in molecular transport related pathway based on the BiNGO analysis. Sub-networks (b) and (c) consist of 15 proteins ( $p < 0.05$ ) and 8 proteins ( $p < 0.04$ ) respectively, enriched in wounding related pathways based on the BiNGO analysis.
